# Supplementary material for: The risk of preterm birth in women with uterine fibroids: A systematic review and meta-analysis
Source: PubMed Central journal article supplement (PMC9162311; doi:10.1371/journal.pone.0269478), 2022-06-02
Supplement: pone.0269478.s002.pdf [file pone.0269478.s002.pdf]

## S2 Appendix – Search strategy

### PubMed 9 jun 2021 (1106)

| Search    | Query                                                                                                                                                                                                                                                                                                                                                                                                                                                                                                                                                                                           | Items found   |
|-----------|-------------------------------------------------------------------------------------------------------------------------------------------------------------------------------------------------------------------------------------------------------------------------------------------------------------------------------------------------------------------------------------------------------------------------------------------------------------------------------------------------------------------------------------------------------------------------------------------------|---------------|
| <b>#3</b> | <b>#1 AND #2</b>                                                                                                                                                                                                                                                                                                                                                                                                                                                                                                                                                                                | <b>1106</b>   |
| <b>#2</b> | "Obstetric Labor, Premature"[Mesh] OR "Infant, Premature"[Mesh] OR "Fetal Membranes, Premature Rupture"[Mesh:NoExp] OR "Abortion, Spontaneous"[Mesh] OR preatur*[tiab] OR preterm*[tiab] OR "pre matur*"[tiab] OR preterm*[tiab] OR "pre term*"[tiab] OR ptb[tiab] OR ptbs[tiab] OR prom[tiab] OR proms[tiab] OR pprom[tiab] OR pproms[tiab] OR abortion*[tiab] OR miscarr*[tiab] OR "pregnancy loss*"[tiab] OR "loss of pregnanc*"[tiab] OR "embryo loss*"[tiab] OR "embryo death*"[tiab] OR "embryo resorption*"[tiab] OR "embryo disintegration*"[tiab] OR "disintegration of embryo*"[tiab] | <b>331453</b> |
| <b>#1</b> | "Myoma"[Mesh:NoExp] OR "Leiomyoma"[Mesh] OR myoma*[tiab] OR leiomyoma*[tiab] OR adenomyoma*[tiab] OR fibroid*[tiab] OR fibroma*[tiab] OR fibromyoma*[tiab] OR angiomyoma*[tiab] OR angioleiomyoma*[tiab]                                                                                                                                                                                                                                                                                                                                                                                        | <b>45251</b>  |

### Embase.com 9 jun 2021 (1750)

| Search    | Query                                                                                                                                                                                                                                                                                                                                                                                                                                                                                                                                                                                                                                                                                                    | Items found   |
|-----------|----------------------------------------------------------------------------------------------------------------------------------------------------------------------------------------------------------------------------------------------------------------------------------------------------------------------------------------------------------------------------------------------------------------------------------------------------------------------------------------------------------------------------------------------------------------------------------------------------------------------------------------------------------------------------------------------------------|---------------|
| <b>#4</b> | <b>#3 NOT 'conference abstract'/it</b>                                                                                                                                                                                                                                                                                                                                                                                                                                                                                                                                                                                                                                                                   | <b>1750</b>   |
| <b>#3</b> | <b>#1 AND #2</b>                                                                                                                                                                                                                                                                                                                                                                                                                                                                                                                                                                                                                                                                                         | <b>2277</b>   |
| <b>#2</b> | 'immature and premature labor'/exp OR 'premature fetus membrane rupture'/exp OR 'spontaneous abortion'/exp OR 'second trimester abortion'/exp OR 'embryo death'/exp OR 'pregnancy loss'/exp OR 'embryo resorption'/exp OR preatur*:ti,ab,kw OR 'pre matur*':ti,ab,kw OR preterm*:ti,ab,kw OR 'pre term*':ti,ab,kw OR ptb:ti,ab,kw OR ptbs:ti,ab,kw OR prom:ti,ab,kw OR proms:ti,ab,kw OR pprom:ti,ab,kw OR pproms:ti,ab,kw OR abortion*:ti,ab,kw OR miscarr*:ti,ab,kw OR 'pregnancy loss*':ti,ab,kw OR 'loss of pregnanc*':ti,ab,kw OR 'embryo loss*':ti,ab,kw OR 'embryo death*':ti,ab,kw OR 'embryo resorption*':ti,ab,kw OR 'embryo disintegration*':ti,ab,kw OR 'disintegration of embryo*':ti,ab,kw | <b>456063</b> |
| <b>#1</b> | 'myoma'/exp OR 'adenomyoma'/exp OR 'fibromatosis'/de OR 'fibroma'/de OR myoma*:ti,ab,kw OR leiomyoma*:ti,ab,kw OR adenomyoma*:ti,ab,kw OR fibroid*:ti,ab,kw OR fibroma*:ti,ab,kw OR fibromyoma*:ti,ab,kw OR angiomyoma*:ti,ab,kw OR angioleiomyoma*:ti,ab,kw                                                                                                                                                                                                                                                                                                                                                                                                                                             | <b>74776</b>  |

### Web of Science Core Collection 9 jun 2021 (779)

| Search    | Query                                                                                                                                                                                                                                                                                                                                      | Items found   |
|-----------|--------------------------------------------------------------------------------------------------------------------------------------------------------------------------------------------------------------------------------------------------------------------------------------------------------------------------------------------|---------------|
| <b>#3</b> | <b>#1 AND #2</b>                                                                                                                                                                                                                                                                                                                           | <b>779</b>    |
| <b>#2</b> | TS=("preatur*" OR "preterm*" OR "pre matur*" OR "preterm*" OR "pre term*" OR "ptb" OR "ptbs" OR "prom" OR "proms" OR "pprom" OR "pproms" OR "abortion*" OR "miscarr*" OR "pregnancy loss*" OR "loss of pregnanc*" OR "embryo loss*" OR "embryo death*" OR "embryo resorption*" OR "embryo disintegration*" OR "disintegration of embryo*") | <b>324813</b> |
| <b>#1</b> | TS=("myoma*" OR "leiomyoma*" OR "adenomyoma*" OR "fibroid*" OR "fibroma*" OR "fibromyoma*" OR "angiomyoma*" OR "angioleiomyoma*")                                                                                                                                                                                                          | <b>35394</b>  |
