# Supplementary material for: The risk of preterm birth in women with uterine fibroids: A systematic review and meta-analysis
Source: PubMed Central journal article supplement (PMC9162311; doi:10.1371/journal.pone.0269478), 2022-06-02
Supplement: pone.0269478.s005.pdf [file pone.0269478.s005.pdf]

**S2 Table** Definitions of preterm birth per study

| <b>Study</b>              | <b>Type of preterm birth</b>     | <b>Lower gestational age cut-off</b> |
|---------------------------|----------------------------------|--------------------------------------|
| Eze et al.                | Total                            | Not reported                         |
| Zhao et al.               | Total                            | 28                                   |
| Stout et al.              | Total                            | Not reported                         |
| Chen et al.               | Total                            | Not reported                         |
| Girault et al.            | Total, spontaneous and indicated | 22                                   |
| Lai et al., Qidwai et al. | Total                            | 24                                   |
| Blitz et al.              | Total                            | 20                                   |
| Ciavattini et al.         | Spontaneous                      | 24                                   |
| Arisoy et al.             | Total                            | 20                                   |
| Egbe et al.               | Total                            | 28                                   |
| Shavell et al.            | Total                            | 20                                   |
