# Supplementary material for: The risk of preterm birth in women with uterine fibroids: A systematic review and meta-analysis
Source: PubMed Central journal article supplement (PMC9162311; doi:10.1371/journal.pone.0269478), 2022-06-02
Supplement: pone.0269478.s006.pdf [file pone.0269478.s006.pdf]

**S3 Table** Crude and adjusted effect sizes of preterm birth and PPROM

| Study                        | Preterm birth <37 weeks |                        | Preterm birth <34 weeks |                        | Preterm birth <32 weeks |                        | Preterm birth <28 weeks |                        | PPROM               |                        |
|------------------------------|-------------------------|------------------------|-------------------------|------------------------|-------------------------|------------------------|-------------------------|------------------------|---------------------|------------------------|
|                              | Crude OR/RR (95%CI)     | Adjusted OR/RR (95%CI) | Crude OR/RR (95%CI)     | Adjusted OR/RR (95%CI) | Crude OR/RR (95%CI)     | Adjusted OR/RR (95%CI) | Crude OR/RR (95%CI)     | Adjusted OR/RR (95%CI) | Crude OR/RR (95%CI) | Adjusted OR/RR (95%CI) |
| Eze et al.                   | 1.72<br>(0.37-7.91)     | NR                     |                         |                        |                         |                        |                         |                        | 1.27<br>(0.17-9.20) | NR                     |
| Zhao et al.                  | 1.12<br>(0.99-1.27)     | 1.00<br>(0.90-1.20)    |                         |                        |                         |                        |                         |                        | 1.15<br>(1.05-1.26) | NR                     |
| Stout et al.                 | 1.52<br>(1.34-1.72)     | 1.50<br>(1.30-1.80)    | 1.40<br>(1.12-1.76)     | 1.40<br>(1.00-1.80)    |                         |                        |                         |                        | 1.39<br>(1.09-1.78) | 1.30<br>(1.00-1.70)    |
| Chen et al.                  | 1.46<br>(1.33-1.61)     | 1.32<br>(1.19-1.46)    |                         |                        |                         |                        |                         |                        |                     |                        |
| Girault et al.               | 1.44<br>(0.88-2.37)     | 2.90<br>(1.70-4.90)    | 1.78<br>(0.96-3.30)     | NR                     |                         |                        |                         |                        | 0.90<br>(0.40-2.04) | NR                     |
| Lai et al.,<br>Qidwai et al. | 1.63<br>(1.27-2.10)     | 1.45<br>(1.08-1.96)    | 1.82<br>(1.27-2.59)     | 1.70<br>(1.12-2.58)    | 1.93<br>(1.26-2.94)     | 1.9<br>(1.17-3.20)     | 2.01<br>(1.18-3.41)     | 1.99<br>(1.05-3.75)    | 1.65<br>(0.98-2.80) | 1.54<br>(0.82-2.89)    |
| Blitz et al.                 | 1.95<br>(1.51-2.53)     | NR                     | 2.44<br>(1.66-3.58)     | NR                     | 2.10<br>(1.28-3.44)     | NR                     | 2.48<br>(1.38-4.44)     | NR                     |                     |                        |
| Ciavattini et al.            | 2.33<br>(1.11-4.88)     | NR                     |                         |                        |                         |                        |                         |                        | 16.03<br>(2.10-122) | NR                     |
| Arisoy et al.                | 4.68<br>(1.88-11.6)     | NR                     | 4.24<br>(1.30-13.9)     | NR                     | 3.3<br>(0.8-13.4)       | NR                     |                         |                        | 6.73<br>(1.40-32.3) | NR                     |
| Egbe et al.                  | 1.52<br>(0.53-4.42)     | NR                     |                         |                        |                         |                        |                         |                        |                     |                        |

NR not reported, no adjusted analysis was performed
